# Supplementary material for: The Architecture of Gene Regulatory Variation across Multiple Human Tissues: The MuTHER Study
Source: PLOS journal article supplement (doi:10.1371/journal.pgen.1002003), 2011-02-03
Supplement: S10 (10.1371/journal.pgen.1002003.s010) [file journal.pgen.1002003.s010]

**Table S1.**

a)*cis* eQTL associations detected with SRC

| **Number of Significant Genes, SRC** | | |  | | | |
| --- | --- | --- | --- | --- | --- | --- |
|  | **LCL** | | **SKIN** | | **FAT** | |
| **Permutation Threshold** | **Twin 1** | **Twin 2** | **Twin 1** | **Twin 2** | **Twin 1** | **Twin 2** |
| 10-4 | 296 | 360 | 123 | 125 | 303 | 304 |
| 10-3 | 509 | 556 | 238 | 231 | 462 | 488 |
| 10-2 | 1014 | 1059 | 605 | 676 | 982 | 1068 |

b)*cis* eQTL associations detected with SRC-FA

| **Number of Significant Genes, SRC-FA** | | |  | | | |
| --- | --- | --- | --- | --- | --- | --- |
|  | **LCL** | | **SKIN** | | **FAT** | |
| **Permutation Threshold** | **Twin 1** | **Twin 2** | **Twin 1** | **Twin 2** | **Twin 1** | **Twin 2** |
| 10-4 | 721 | 828 | 329 | 344 | 690 | 720 |
| 10-3 | 1064 | 1220 | 532 | 542 | 1052 | 1070 |
| 10-2 | 1839 | 1967 | 1103 | 1080 | 1732 | 1812 |
