# Supplementary material for: The Architecture of Gene Regulatory Variation across Multiple Human Tissues: The MuTHER Study
Source: PLOS journal article supplement (doi:10.1371/journal.pgen.1002003), 2011-02-03
Supplement: S15 (10.1371/journal.pgen.1002003.s015) [file journal.pgen.1002003.s015]

**Table S6.**

| **#Twin 1** |  |  |  |
| --- | --- | --- | --- |
| **Reference** | **Secondary** | **SRC analysis 1** | **SRC-FA analysis 1** |
| **LCL** | SKIN | 0.67 | 0.71 |
| FAT | 0.73 | 0.77 |
| **SKIN** | LCL | 0.77 | 0.67 |
| FAT | 0.72 | 0.84 |
| **FAT** | LCL | 0.63 | 0.72 |
| SKIN | 0.73 | 0.78 |
|  |  |  |  |
| **#Twin 2** |  |  |  |
| **Reference** | **Secondary** | **SRC**  **analysis 1** | **SRC-FA analysis 1** |
| **LCL** | SKIN | 0.53 | 0.66 |
| FAT | 0.73 | 0.75 |
| **SKIN** | LCL | 0.72 | 0.71 |
| FAT | 0.80 | 0.84 |
| **FAT** | LCL | 0.69 | 0.58 |
| SKIN | 0.81 | 0.76 |
