# Supplementary material for: The Architecture of Gene Regulatory Variation across Multiple Human Tissues: The MuTHER Study
Source: PLOS journal article supplement (doi:10.1371/journal.pgen.1002003), 2011-02-03
Supplement: S16 (10.1371/journal.pgen.1002003.s016) [file journal.pgen.1002003.s016]

**Table S7.**

|  | **Weight prior** | | **Noise prior** | |
| --- | --- | --- | --- | --- |
|  | **Mean** | **Observations** | **Mean** | **Observations** |
| **LCL** | 10-6 | 23 | 10-3 | 10 |
| **SKIN** | 10-6 | 23 | 10-1 | 100 |
| **FAT** | 10-6 | 23 | 10-3 | 10 |
